# Supplementary material for: Everyday resilience in district health systems: emerging insights from the front lines in Kenya and South Africa
Source: PubMed Central journal article supplement — BMJ Glob Health. 2017 Jun 2;2(2):e000224. doi: 10.1136/bmjgh-2016-000224 (PMC5656138; doi:10.1136/bmjgh-2016-000224), 2017-06-02
Supplement: bmjgh-2016-000224supp001.pdf [file bmjgh-2016-000224supp001.pdf]

## On-line Annex: Learning site contexts

| <b>Indicator</b> | <b>Kilifi County, 2012<br/>(unless otherwise stated)</b><br><br>(primary source <sup>1</sup> )                                   | <b>Mitchell's Plain sub-district, City of Cape Town, 2014/15<br/>(unless otherwise stated)</b><br><br>(primary sources <sup>2,3</sup> )                                                                                                                                                              | <b>Sedibeng District, 2014/15<br/>(unless otherwise stated)</b><br><br>(primary sources <sup>3,4</sup> )                                                                                                                              |
|------------------|----------------------------------------------------------------------------------------------------------------------------------|------------------------------------------------------------------------------------------------------------------------------------------------------------------------------------------------------------------------------------------------------------------------------------------------------|---------------------------------------------------------------------------------------------------------------------------------------------------------------------------------------------------------------------------------------|
| Rural/urban      | Majority rural population                                                                                                        | Urban                                                                                                                                                                                                                                                                                                | Urban                                                                                                                                                                                                                                 |
| Population       | 1.2 million<br>(8 <sup>th</sup> largest in country)                                                                              | 440,707<br>(provincial government estimate)<br>535224<br>(City of Cape Town estimate)                                                                                                                                                                                                                | 922,050                                                                                                                                                                                                                               |
| Poverty rate     | 71.4% live below national poverty line (nat. average of 45%)                                                                     | Unemployment 30% (estimated from 2011 census)<br><br>South African index of multiple deprivation, Districts is quintile 5 (least deprived)                                                                                                                                                           | Unemployment 32% (estimated from 2011 census)<br><br>South African index of multiple deprivation, District is quintile 5 (least deprived)                                                                                             |
| Health financing | <i>Total government health expenditure per capita</i><br><br>17\$ (2012) vs. national average 19\$ (2013)                        | <i>PHC expenditure per capita<sup>1</sup></i><br><br><u>Sub-district:</u><br>\$57/R640, uninsured population<br><br><u>District:</u><br>\$87/ R981 uninsured population,<br>\$63.6/ R715 total pop.<br><br><u>National average:</u><br>\$80/ R897.3 uninsured population;<br>\$66 / R742, total pop. | <i>PHC expenditure per capita<sup>1</sup></i><br><br><u>District:</u><br>\$100/R1124, uninsured population<br>\$80.6/ R906, total pop.<br><br><u>National average:</u><br>\$80/ R897.3 uninsured population<br>\$66 / R742, total pop |
| Health workers   | 30 nurses/100,000 (national av. 55)<br><br>4 doctors/100,000 (national av. 10)<br>17 clinical officers/100,000 (national av. 21) | 33 nurses /100,000 (total pop)<br>43 nurse/100,000 (uninsured pop.)<br><br>3 doctors/100,000 (total pop)<br>4 doctors/100,000 (uninsured)                                                                                                                                                            | Data not available                                                                                                                                                                                                                    |
| PHC utilisation  | 3.0 visits/ head, per year (2013)<br><br>(source <sup>5</sup> )                                                                  | 2.8 visits/ head, per year, total pop.<br>3.1 visits/ head per year, dependent pop. <sup>2</sup><br><br>(national av. 2.4 visits/head, total pop)                                                                                                                                                    | 2.6 visits/head per year, total pop. (2011/12)<br><br>(national av. 2.6 visits/head, total pop.)                                                                                                                                      |

| Indicator                                                                                                                                                                                                                                                                                                                                                                                                                                                                                                             | Kilifi County, 2012<br>(unless otherwise stated)<br><br>(primary source <sup>1</sup> )                                 | Mitchell's Plain sub-district, City of Cape Town, 2014/15<br>(unless otherwise stated)<br><br>(primary sources <sup>2,3</sup> )                                                                                 | Sedibeng District, 2014/15<br>(unless otherwise stated)<br><br>(primary sources <sup>3,4</sup> )                                                                                              |
|-----------------------------------------------------------------------------------------------------------------------------------------------------------------------------------------------------------------------------------------------------------------------------------------------------------------------------------------------------------------------------------------------------------------------------------------------------------------------------------------------------------------------|------------------------------------------------------------------------------------------------------------------------|-----------------------------------------------------------------------------------------------------------------------------------------------------------------------------------------------------------------|-----------------------------------------------------------------------------------------------------------------------------------------------------------------------------------------------|
| PHC performance                                                                                                                                                                                                                                                                                                                                                                                                                                                                                                       | Pregnant women 4+ ANC visits 65%<br><br>Women 15-49 tested for HIV in past 12mos and received results of last test 42% | <u>District:</u><br>ANC care 1 <sup>st</sup> visit before 20 weeks, 61.5% (national av. 53.9%; provincial av. 65.8%)<br><br>ANC client initiated on ART rate, 84.1%% (national av. 91,2%, provincial av. 82.8%) | <u>District:</u><br>ANC 1st visit before 20 weeks, 56.9% (national av. 53.9%; provincial av. 65.8%)<br><br>ANC client initiated on ART rate, 90.0% (national av. 91,2%, provincial av. 82.8%) |
| <p>Notes:</p> <p>1) In South Africa the 'uninsured population' refers to those not covered by private health insurance and so most likely to be dependent on public health care</p> <p>2) The 'dependent population' is an alternative way of calculating that portion of the population likely to be dependent on the public health system, based on employment and income</p> <p>ANC = antenatal care<br/> ART = anti retroviral therapy<br/> HIV = human immunodeficiency virus<br/> PHC = primary health care</p> |                                                                                                                        |                                                                                                                                                                                                                 |                                                                                                                                                                                               |

#### References:

1. Ministry of Health. Kilifi County-Health at a glance. Nairobi: Kenya; 2015
3. District Health Expenditure Review 2014/15, Cape Town. Department of Health, Republic of South Africa; 2015.
3. Massyn N, Peer N, Padarath A, Barron P, Day C. *The District Health Barometer 2013/2014*. Durban: Health Systems Trust; 2014.
4. Massyn N, Day C, Barron P, Haynes R, English R, Padarath A. *The District Health Barometer 2011/12*. Durban: Health Systems Trust; 2013.
5. Ministry of Health. 2013 Kenya household expenditure and utilization survey. Nairobi: Kenya; 2014
